# Supplementary material for: Suppression of integrin α3β1 by α9β1 in the epidermis controls the paracrine resolution of wound angiogenesis
Source: PubMed Central journal article supplement — J Cell Biol. 2017 May 1;216(5):1473–88. doi: 10.1083/jcb.201510042 (PMC5412555; doi:10.1083/jcb.201510042), 2017-05-01
Supplement: JCB_201510042_sm.pdf [file JCB_201510042_sm.pdf]

Longmate et al., <https://doi.org/10.1083/jcb.201510042>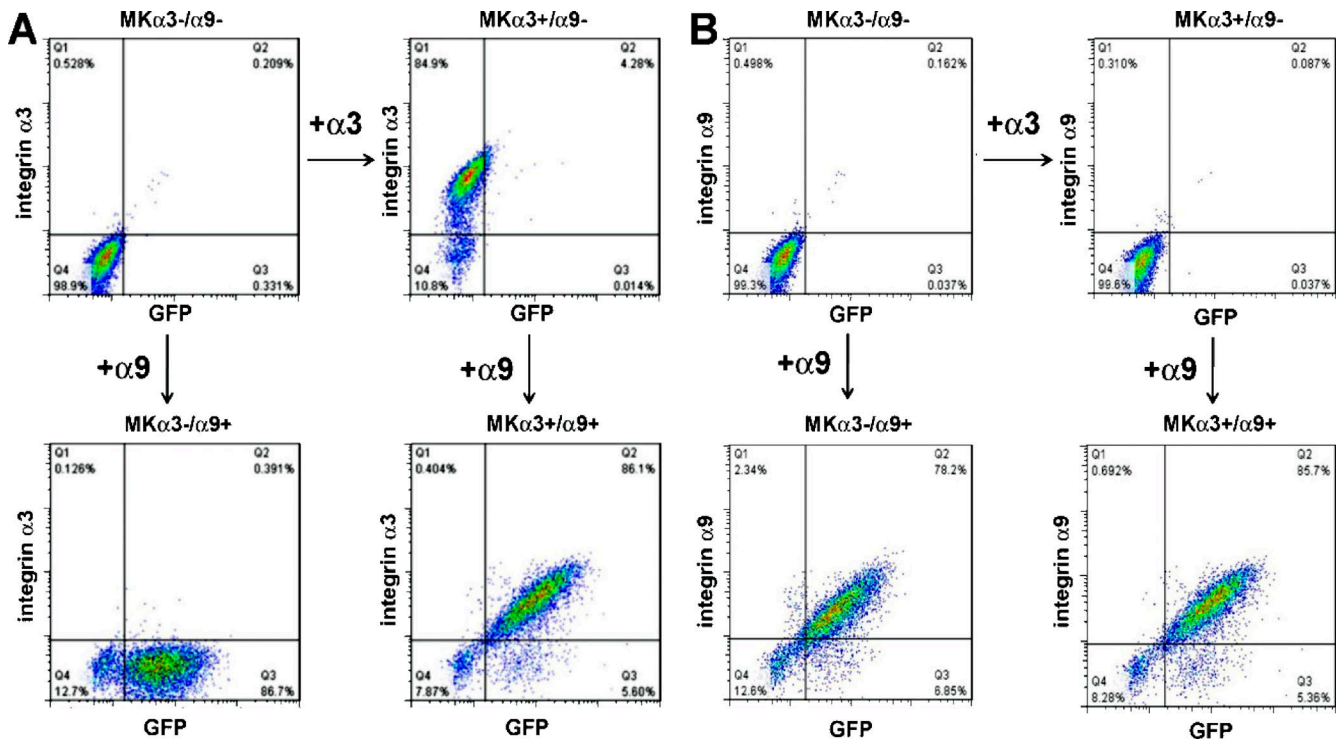

Figure S1. **Flow cytometry of integrins  $\alpha 3\beta 1$  and  $\alpha 9\beta 1$  on the cell surface of MK variants engineered to express the human  $\alpha 3$  and/or  $\alpha 9$  subunits in various combinations.** (A and B) MK genotypes are indicated over each plot. (A) Analysis of human  $\alpha 3$  surface levels with mAb P1B5 (y axis) versus GFP (x axis) confirms appropriate expression of  $\alpha 3\beta 1$  and GFP (i.e., linked to  $\alpha 9$  expression). (B) Direct analysis of human  $\alpha 9$  surface levels with mAb Y9A2 (y axis) versus GFP (x axis) confirms linked expression of GFP and  $\alpha 9\beta 1$ . " $+\alpha 3$ " arrow indicates stable transfection with human  $\alpha 3$ ; " $+\alpha 9$ " arrow indicates stable transduction with retrovirally expressed human  $\alpha 9$  linked to GFP expression through an IRES.

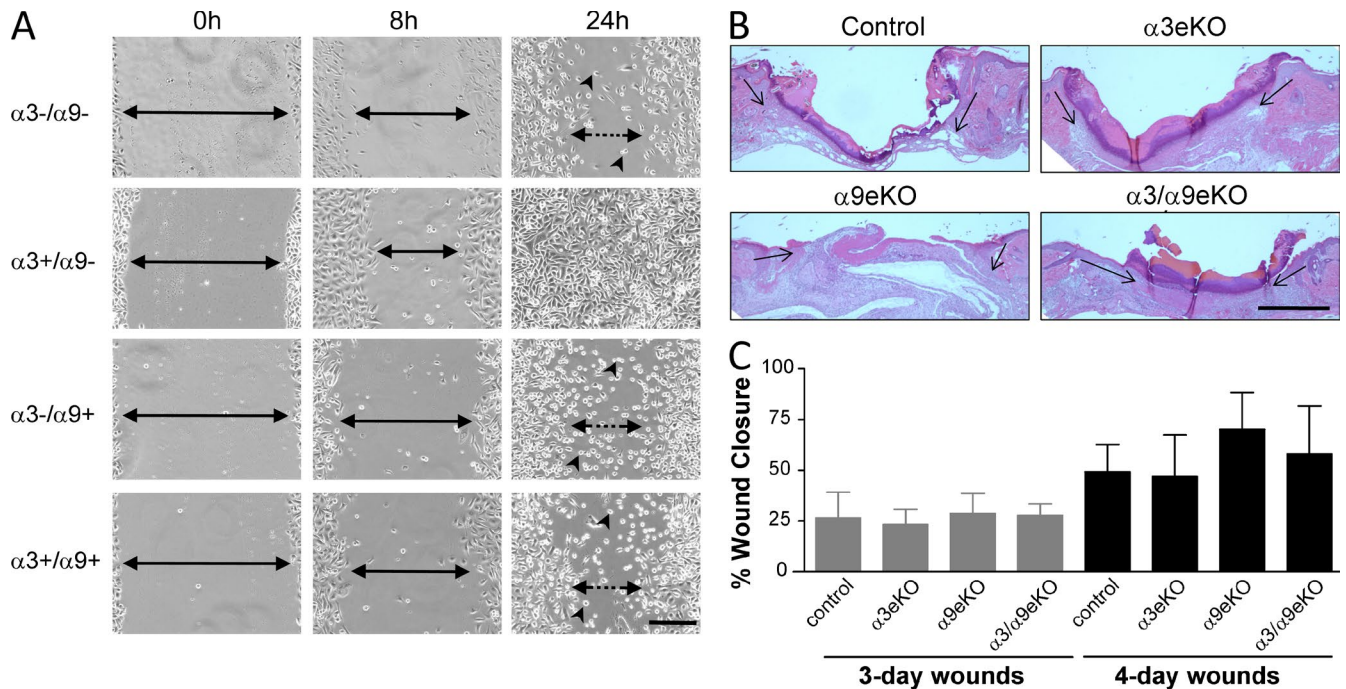

Figure S2.  $\alpha 9\beta 1$  inhibits  $\alpha 3\beta 1$ -dependent scratch wound closure in vitro but not wound reepithelialization in vivo. (A) MK cell variants that express  $\alpha 3\beta 1$  and/or  $\alpha 9\beta 1$  in various combinations, as indicated, were grown to confluence on LN-332-rich ECM and then were subjected to scrape wounds. Wound edge morphology and migration were observed at 0, 8, or 24 h after wounding by phase microscopy. Results are representative of three independent experiments. Double-headed arrows indicate wound width, and arrows with dashed lines indicate poorly defined wound edges caused by cell scattering. Arrowheads point to examples of scattering cells. Bar, 100  $\mu$ m. (B and C) In vivo wound reepithelialization was assessed by hematoxylin and eosin staining of 3-d and 4-d wounds from mice of each genotype. (B) Representative images of 3-d wounds are shown. Arrows indicate the length of the migrating wound epidermises originating from the wound edge. Bar, 500  $\mu$ m. (C) Wound reepithelialization was quantified as follows: percent wound closure = [(length of epidermal tongue 1 + length of epidermal tongue 2)/length of wound bed]  $\times$  100. Means  $\pm$  SEM are shown.  $n \geq 4$  mice per genotype.

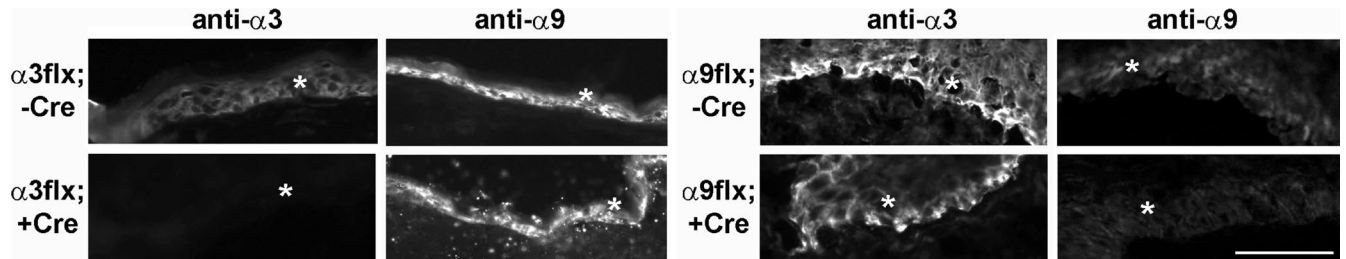

Figure S3. Deletion of  $\alpha 3$  or  $\alpha 9$  integrin subunits in the epidermis of  $\alpha 3$ eKO or  $\alpha 9$ eKO mice, respectively. Cryosections of 5-d fully reepithelialized wounds in mice homozygous for the floxed allele of either  $\alpha 3$  or  $\alpha 9$  and either lacking ( $-Cre$ ) or expressing ( $+Cre$ ) K14-Cre were immunostained with anti- $\alpha 3$  or anti- $\alpha 9$ . Asterisks mark the epidermis. Bar, 50  $\mu$ m.

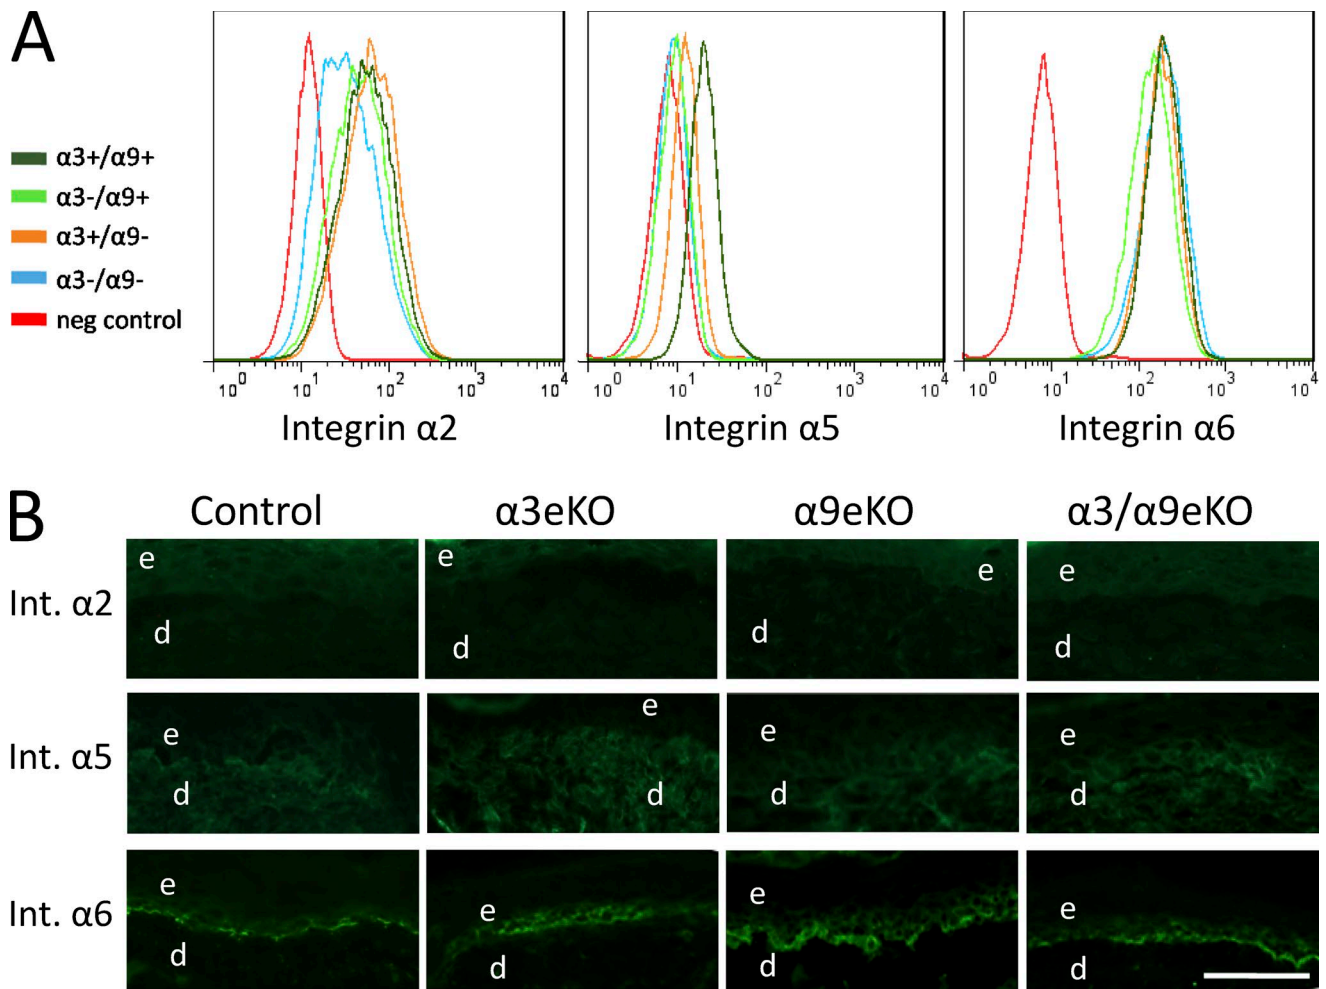

Figure S4. **Levels of other epidermal  $\beta1$  integrins are not substantially altered in cells or mice with manipulated expression of  $\alpha3\beta1$ ,  $\alpha9\beta1$ , or both.** (A) Flow analysis of mouse  $\alpha2$ ,  $\alpha5$  (both expressed at very low levels in resting skin), or  $\alpha6$  (expressed at high levels) confirms similar cell surface expression in MK variants. (B) Immunostaining for  $\alpha2$ ,  $\alpha5$ , or  $\alpha6$  integrins performed on cryosections from the skin of control,  $\alpha3eKO$ ,  $\alpha9eKO$ , and  $\alpha3/\alpha9eKO$  mice confirms similar expression in vivo. Bar, 100  $\mu\text{m}$ . d, dermis; e, epidermis; Int, integrin; neg, negative.

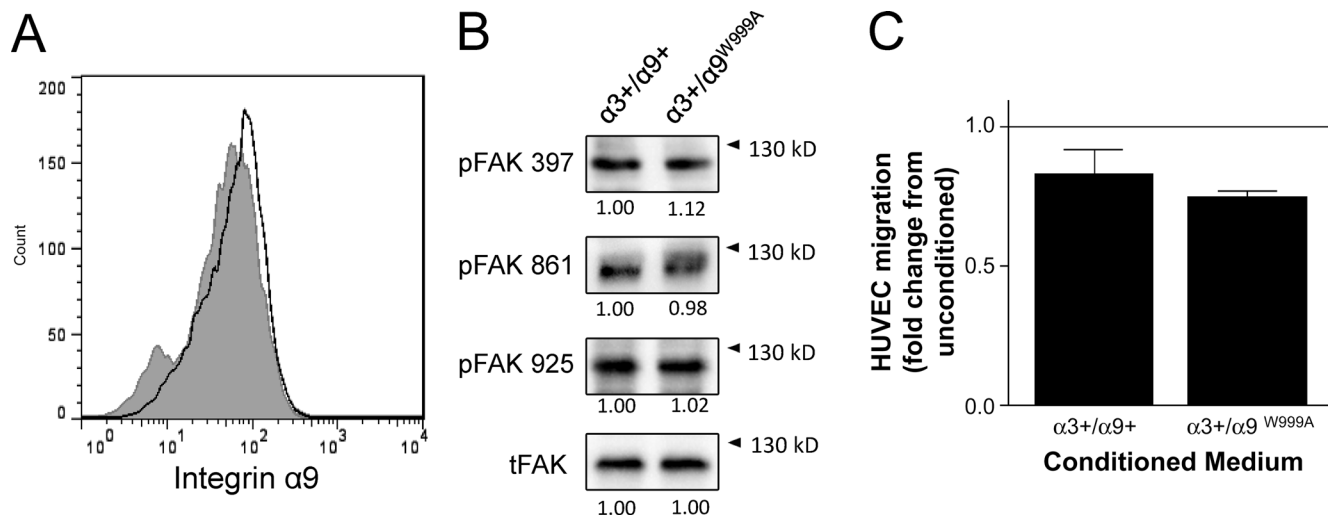

**Figure S5. The paxillin-binding site of the  $\alpha 9$  subunit cytoplasmic tail is dispensable for suppression of the  $\alpha 3\beta 1$ -dependent HUVEC migration response.** (A–C) MK $\alpha 3^{+}/\alpha 9^{-}$  cells were stably transduced with retrovirus encoding wild-type human  $\alpha 9$  (see Fig. S1) or with a mutant of human  $\alpha 9$  that cannot bind paxillin ( $\alpha 9^{W999A}$ ; Liu et al., 2001; Young et al., 2001). (A) Flow cytometry demonstrates comparable surface levels of  $\alpha 9^{W999A}$  (black outline) and wild-type  $\alpha 9$  (shaded area). (B) Cell lysates were assayed by immunoblotting for FAK phosphorylation at tyrosine residues Y397, Y861, or Y925, as indicated. Representative blots with positions of the 130-kD marker marked by arrowheads. Quantitations below each band represent the mean value from three independent experiments. The value for MK  $\alpha 3^{+}/\alpha 9^{+}$  cells was set to 1.00 for each immunoblot. Note that exposure for each individual blot is optimized to compare signal intensity between wild-type  $\alpha 9$  and  $\alpha 9^{W999A}$ , so phosphorylation differences between distinct tyrosines are not evident here as they are in Fig. 6. (C) Transwell assays were performed as in Fig. 1 to compare the HUVEC migration response to conditioned medium from MK $\alpha 3^{+}/\alpha 9^{+}$  or MK $\alpha 3^{+}/\alpha 9^{W999A}$  cells. Graph shows HUVEC migration relative to that in cells treated with unconditioned medium as a baseline (set to 1.0). Means  $\pm$  SEM are shown.  $n = 3$  independent experiments. A Student's  $t$  test was used.  $P > 0.05$ .

## References

- Liu, S., M. Slepak, and M.H. Ginsberg. 2001. Binding of paxillin to the  $\alpha 9$  integrin cytoplasmic domain inhibits cell spreading. *J. Biol. Chem.* 276:37086–37092. <http://dx.doi.org/10.1074/jbc.M105114200>
- Young, B.A., Y. Taoka, S. Liu, K.J. Askins, Y. Yokosaki, S.M. Thomas, and D. Sheppard. 2001. The cytoplasmic domain of the integrin  $\alpha 9$  subunit requires the adaptor protein paxillin to inhibit cell spreading but promotes cell migration in a paxillin-independent manner. *Mol. Biol. Cell.* 12:3214–3225. <http://dx.doi.org/10.1091/mbc.12.10.3214>
